# Supplementary material for: Amino-functionalized CdSe/ZnS quantum dot-based lateral flow immunoassay for sensitive detection of aflatoxin B1
Source: Royal Society of Chemistry journal article supplement (doi:10.1039/c8ay00608c), 2018-01-01
Supplement: c8ay00608c1.pdf [file c8ay00608c1.pdf]

## Electronic Supplementary Material

### Amino-functionalized CdSe/ZnS Quantum Dot-based Lateral Flow Immunoassay for Sensitive Detection of Aflatoxin B1

Jieying Li,<sup>a,b</sup> Mao Mao,<sup>b</sup> Feng Wu,<sup>b</sup> Qiang Li,<sup>a,b</sup> Luyao Wei,<sup>c</sup> and Lan Ma,<sup>b,c\*</sup>

<sup>a</sup> Department of Chemistry, Tsinghua University, Beijing, 100084, P.R. China

<sup>b</sup> Division of Life Science and Health, Graduate School at Shenzhen, Tsinghua University, Shenzhen, 518055, P. R. China

<sup>c</sup> Tsinghua-Berkeley Shenzhen Institute, Tsinghua University, Beijing, 100084, P. R. China.

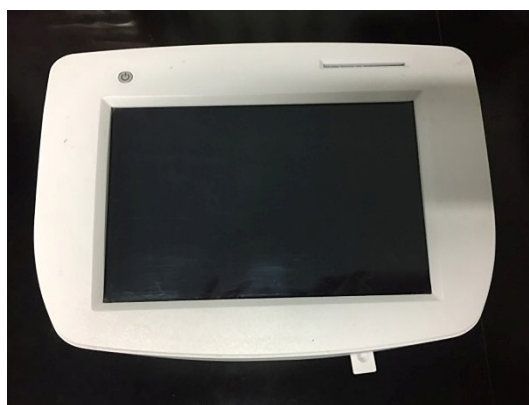

Fig. S1 Portable test strip reader with touch screen integrated with test strip in the test tray

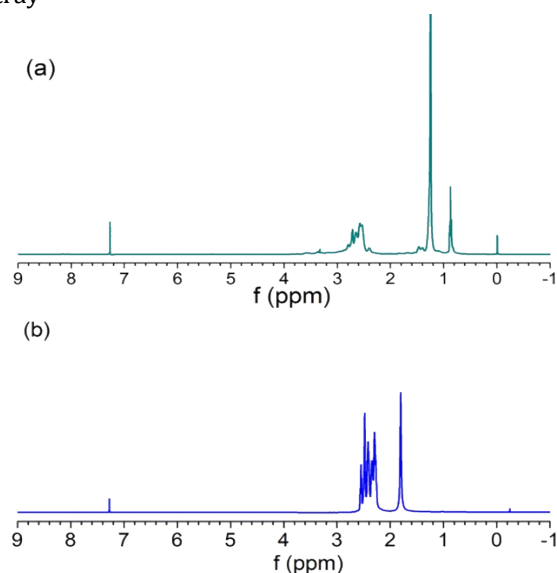

Fig. S2 <sup>1</sup>H NMR spectra of (a) PEI18C and (b) PEI in CDCl<sub>3</sub>.

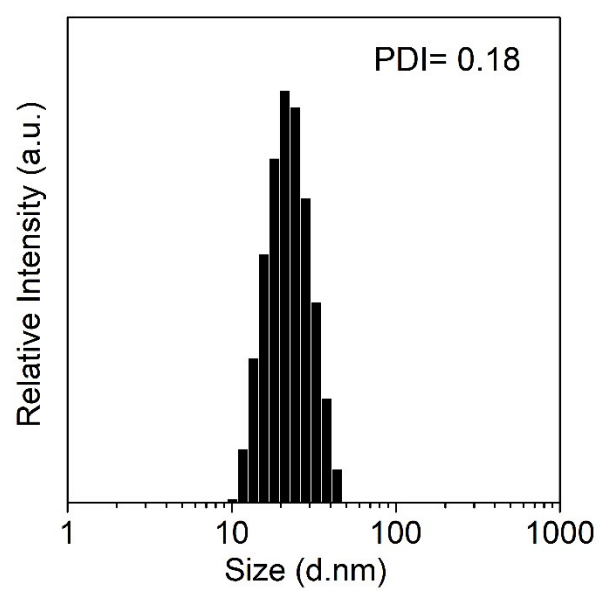

Fig. S3 DLS date of hydrophobic CdSe/ZnS QDs dissolved in CDCl<sub>3</sub>.
